# Supplementary material for: Amorphous System of Hesperetin and Piperine—Improvement of Apparent Solubility, Permeability, and Biological Activities
Source: MDPI journal article supplement (doi:10.3390/ijms24054859), 2023-03-02
Supplement: s1 [file s1]

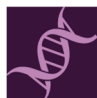

Article

# Amorphous System of Hesperetin and Piperine—Improvement of Apparent Solubility, Permeability, and Biological Activities

Kamil Wdowiak <sup>1</sup>, Andrzej Miklaszewski <sup>2</sup>, Robert Pietrzak <sup>3</sup> and Judyta Cielecka-Piontek <sup>1,\*</sup>

<sup>1</sup> Department of Pharmacognosy, Faculty of Pharmacy, Poznan University of Medical Sciences, Rokietnicka 3, 60-806 Poznan, Poland

<sup>2</sup> Institute of Materials Science and Engineering, Poznan University of Technology, Jana Pawla II 24, 61-138 Poznan, Poland

<sup>3</sup> Faculty of Chemistry, Adam Mickiewicz University in Poznań, Uniwersytetu Poznańskiego 8, 61-614 Poznan, Poland

\* Correspondence: jpiontek@ump.edu.pl

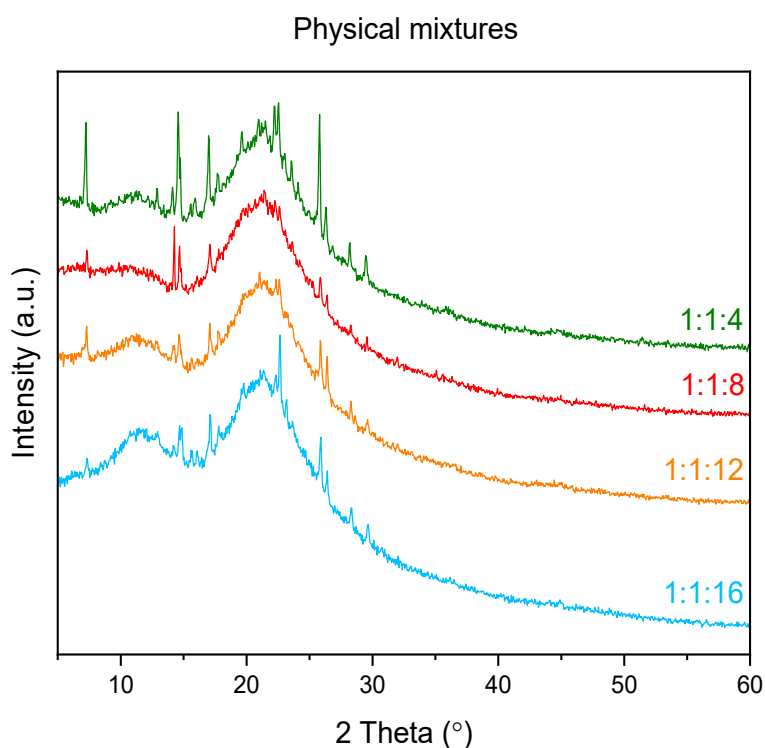

**Figure S1.** Diffractograms physical mixtures of the systems.

The FT-IR pattern of raw hesperetin is characterized by peaks such as 3499 cm<sup>-1</sup> (O-H stretching), 1646 cm<sup>-1</sup> (C=O stretching) strong bands at 1609–1294 cm<sup>-1</sup> (C=C stretching of aromatic ring), 1465–1230 cm<sup>-1</sup> (C-O stretching between the aromatic ring and hydroxyl/methoxy groups), 900–800 cm<sup>-1</sup> (C-H rocking of aromatic ring) [51, 52]. Raw piperine showed characteristic peaks at 2939 cm<sup>-1</sup> (C-H stretching), 1633 cm<sup>-1</sup> (N-H bending), 1581 cm<sup>-1</sup> (N-C=O stretching in carbonyl amide), 1506 cm<sup>-1</sup> (C-NH asymmetric bending and C=C stretching of aromatic ring), 1437 cm<sup>-1</sup> (C=CH<sub>2</sub> CH<sub>2</sub> deformation and bending), 1368 cm<sup>-1</sup> (C-H bending), 1310 cm<sup>-1</sup> (C-N asymmetric stretching), 1252 cm<sup>-1</sup>

(C-O stretching in methylenedioxy group), 927  $\text{cm}^{-1}$  (C-O vibration in methylenedioxy-phenyl) [24,53,54,58]. The FT-IR spectra of pure Kollidon VA64 is described by the peak at 1730  $\text{cm}^{-1}$  (vinyl acetate), 1668  $\text{cm}^{-1}$  (C=O stretching) as well as 1290  $\text{cm}^{-1}$  (C-N vibration) [55-57].

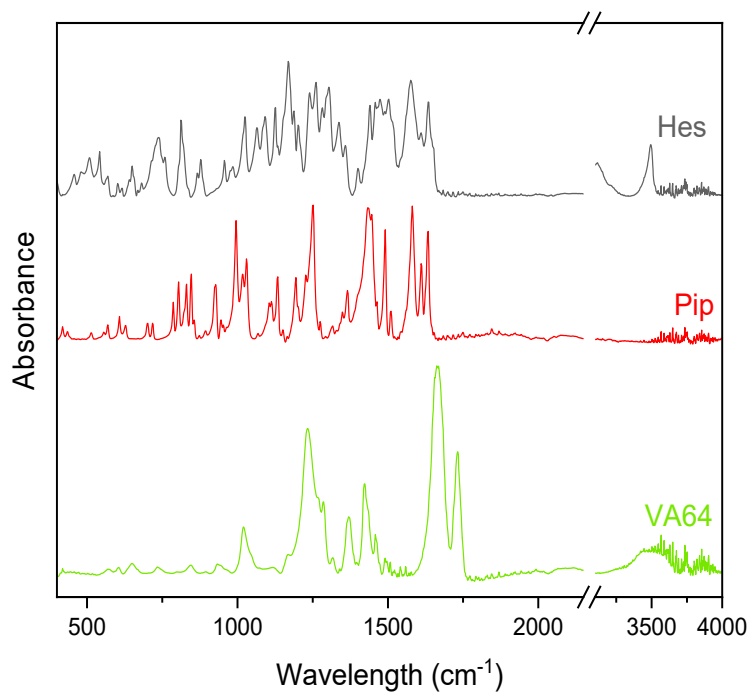

**Figure S2.** FT-IR/ATR spectra of raw compounds

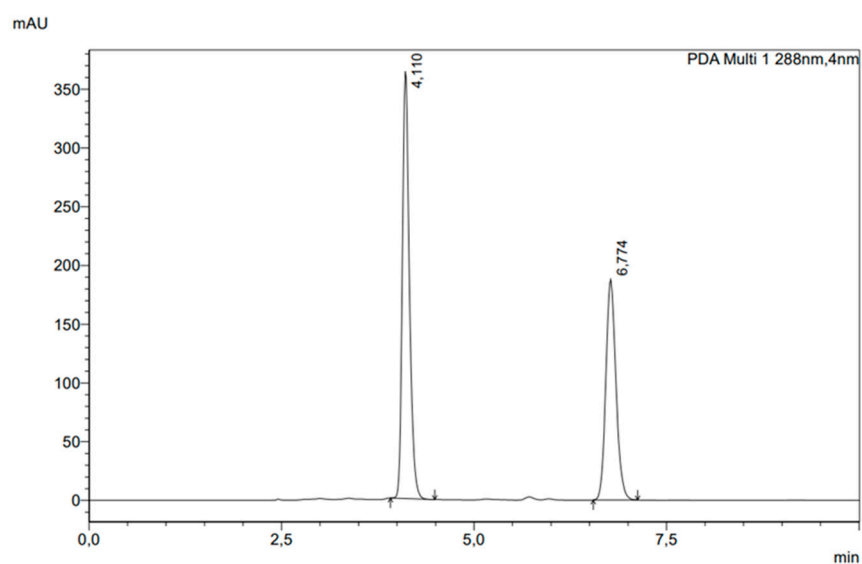

(a)

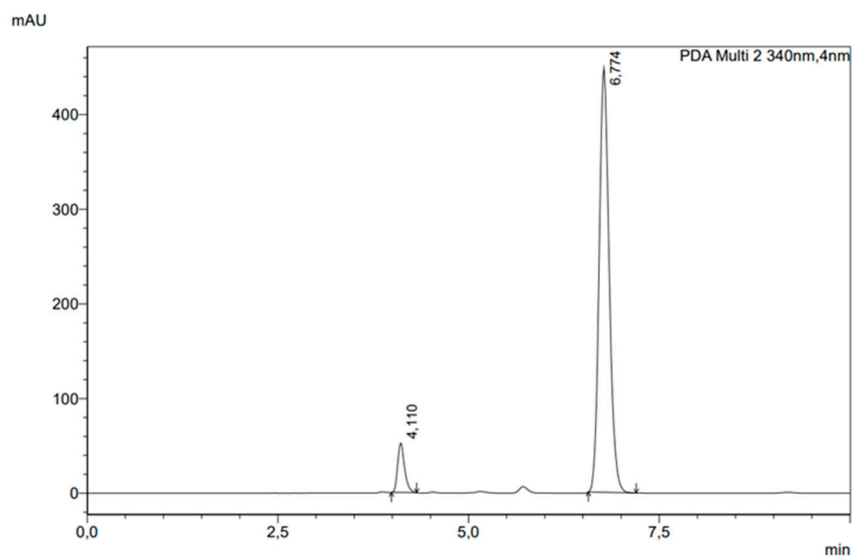

(b)

**Figure S3.** Chromatograms of hesperetin (a) and piperine (b).

Chromatographic conditions

- Stationary phase: Dr. Maisch ReproSil-Pur Basic-C18 100 Å column, 5 µm particle size, 250 × 4.60 mm
- Mobile phase: methanol/0.1% acetic acid (80:20 v/v)
- Column temperature: 30 °C
- Flow rate: 1.0 mL·min<sup>-1</sup>

**Table S1.** Validation parameters of HPLC-DAD method for concentration determination of hesperetin and piperine

| Hesperetin                             |                                                             |
|----------------------------------------|-------------------------------------------------------------|
| Parameter                              | Hesperetin dissolved in 50% DMSO;<br>Injection volume 10 µl |
| Linearity range (mg·mL <sup>-1</sup> ) | 0.00008 – 0.48                                              |
| Correlation coefficient (r)            | 0.9999                                                      |
| a ± S <sub>a</sub>                     | 38446721 ± 196766                                           |
| b ± S <sub>b</sub>                     | insignificant (α=0.05)                                      |
| LOD (mg·mL <sup>-1</sup> )             | 0.0075                                                      |
| LOQ (mg·mL <sup>-1</sup> )             | 0.0228                                                      |
| Retention Time                         | 4.11                                                        |
| Piperine                               |                                                             |
| Parameter                              | Piperine dissolved in 50% DMSO;<br>Injection volume 10 µl   |
| Linearity range (mg·mL <sup>-1</sup> ) | 0.00008 – 0.16                                              |
| Correlation coefficient (r)            | 0.9975                                                      |
| a ± S <sub>a</sub>                     | 68194881 ± 1815271                                          |

| $b \pm S_b$                            | insignificant ( $\alpha=0.05$ ) |
|----------------------------------------|---------------------------------|
| LOD ( $\text{mg}\cdot\text{mL}^{-1}$ ) | 0.0136                          |
| LOQ ( $\text{mg}\cdot\text{mL}^{-1}$ ) | 0.0411                          |
| Retention Time (min)                   | 6.77                            |

## References

24. Garrido, B.; González, S.; Hermosilla, J.; Millao, S.; Quilaqueo, M.; Guineo, J.; Acevedo, F.; Pesenti, H.; Rolleri, A.; Shene, C. Carbonate- $\beta$ -cyclodextrin-based nanosponge as a nanoencapsulation system for piperine: physicochemical characterization. *J. Soil Sci. Plant Nutr.* **2019**, *19*, 620–630.
51. Guo, J.; Tang, W.; Lu, S.; Fang, Z.; Tu, K.; Zheng, M. Solubility improvement of hesperetin by using different octenyl succinic anhydride modified starches. *LWT* **2018**, *95*, 255–261.
52. Krysa, M.; Szymańska-Chargot, M.; Zdunek, A. FT-IR and FT-Raman fingerprints of flavonoids—a review. *Food Chem.* **2022**, 133430.
53. Gorgani, L.; Mohammadi, M.; Najafpour, G.D.; Nikzad, M. Sequential microwave-ultrasound-assisted extraction for isolation of piperine from black pepper (*Piper nigrum* L.). *Food Bioprocess Technol.* **2017**, *10*, 2199–2207.
54. Quilaqueo, M.; Millao, S.; Luzardo-Ocampo, I.; Campos-Vega, R.; Acevedo, F.; Shene, C.; Rubilar, M. Inclusion of piperine in  $\beta$ -cyclodextrin complexes improves their bioaccessibility and in vitro antioxidant capacity. *Food Hydrocoll.* **2019**, *91*, 143–152.
55. Školáková, T.; Slámová, M.; Školáková, A.; Kadeřábková, A.; Patera, J.; Zámotný, P. Investigation of dissolution mechanism and release kinetics of poorly water-soluble tadalafil from amorphous solid dispersions prepared by various methods. *Pharmaceutics* **2019**, *11*, 383.
56. Ijaz, Q.A.; Latif, S.; Rashid, M.; Arshad, M.S.; Hussain, A.; Bukhari, N.I.; Riaz, S.; Abbas, N. Preparation and Characterization of pH-Independent Sustained-Release Tablets Containing Hot Melt Extruded Solid Dispersions of Clarithromycin. *AAPS PharmSciTech* **2021**, *22*, 1–12.
57. Fu, Q.; Fang, M.; Hou, Y.; Yang, W.; Shao, J.; Guo, M.; Li, M.; Li, J.; Wang, Y.; He, Z. A physically stabilized amorphous solid dispersion of nisoldipine obtained by hot melt extrusion. *Powder Technol.* **2016**, *301*, 342–348.
58. Liu, K.; Liu, H.; Li, Z.; Li, W.; Li, L. In vitro dissolution study on inclusion complex of piperine with ethylenediamine- $\beta$ -cyclodextrin. *J. Incl. Phenom. Macrocycl. Chem.* **2020**, *96*, 233–243.
